# Supplementary material
Source: publisher figshare collection journal article supplement (https://karger.figshare.com/ndownloader/files/23061125)
Supplement: Supplementary file 1 [file 23061125]

**Figure S-A.** Dose-dependent release of GAPDH with rapamycin treatment. (A) Densitometric quantification and representative western blot of conditioned medium (CM) from rat aortic smooth muscle cells (RASMCs) incubated with rapamycin (1.25–10 μmol/L) for 24 hours.

**Figure S-B.** The rapamycin-induced apoptosis is mediated by myosin II activation. (B) Densitometric quantification and representative western blot of total cell lysate (TCL) from RASMCs that were pre-incubated with 10 μmol/L blebbistatin for 1 hour and then exposed to 5 μmol/L rapamycin for 24 hours.

**Figure S-C.** Rapamycin induces the release of cyclophilin A (CyPA) through an ULK 1-independent pathway. (C) Densitometric quantification and representative Western blot of TCL and CM from RASMCs that were transfected with ULK 1 siRNA and then incubated with 5 μmol/L rapamycin for 24 hours.
